# Supplementary material for: Polyacetals of higher cyclic formals: synthesis, properties and application as polymer electrolytes
Source: Royal Society of Chemistry journal article supplement (doi:10.1039/d4py01194e), 2025-01-01
Supplement: d4py01194e1.pdf [file d4py01194e1.pdf]

## Supporting information for

### Polyacetals of higher cyclic formals. Synthesis, properties and application as polymer electrolytes

Bartłomiej Kost<sup>1</sup>, Malgorzata Basko<sup>1</sup>, Sławomir Kaźmierski<sup>1</sup>, Ewa Zygadło-Monikowska<sup>2</sup>,  
Magdalena Słojewska<sup>2</sup>, Przemysław Kubisa<sup>1</sup>

<sup>1</sup>Centre of Molecular and Macromolecular Studies, Polish Academy of Sciences

Sienkiewicza 112, 90-363, Łódź, Poland

<sup>2</sup>Faculty of Chemistry, Warsaw University of Technology, Noakowskiego 3, Warszawa,  
Poland

Email: [bartlomiej.kost@cbmm.lodz.pl](mailto:bartlomiej.kost@cbmm.lodz.pl)

#### Table of content

**Table S1.** Diffusion coefficient values of free LiOTf and in the mixture with POME02, POME03, POME04 and PEO ..... 2

**Figure S1.** <sup>1</sup>H NMR of the OME0x macrocyclic acetals

**Figure S2.** Size Exclusion Chromatography (SEC) curves of purified homopolymers prepared a) with triethyloxonium tetrafluoroborate (runs 1,2 and 3), and b) with triethyloxonium hexafluoroantimonate (run 4, 5, and 6) ..... 2

**Table 1.** Diffusion coefficient values of free LiOTf and in the mixture with POME02, POME03, POME04 and PEO

| Sample | Li chemical shift [ppm] | Diffusion coefficient [m <sup>2</sup> /s] |
|--------|-------------------------|-------------------------------------------|
| LiOTf  | -1.76                   | $1.26 \times 10^{-9}$                     |
| PEO2   | -1.425                  | $1.11 \times 10^{-9}$                     |
| PEO3   | -1.29                   | $8.84 \times 10^{-10}$                    |
| PEO4   | -1.27                   | $8.13 \times 10^{-10}$                    |
| MPEG   | -1.33                   | $8.13 \times 10^{-10}$                    |

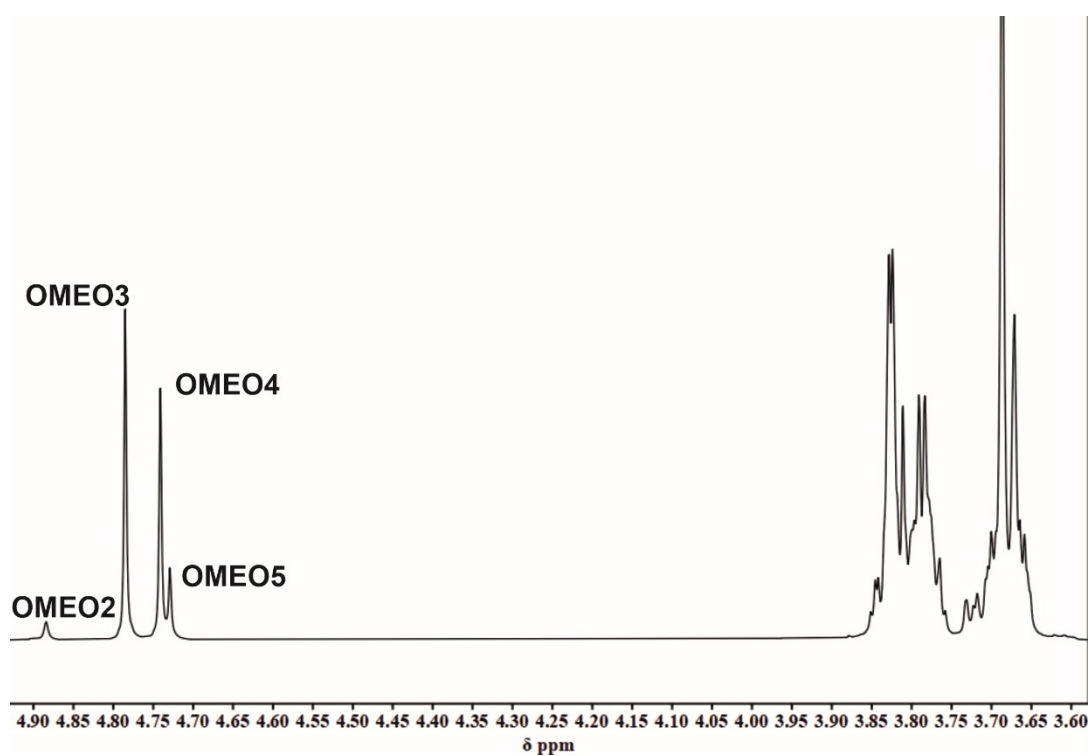

**Figure S1.** <sup>1</sup>H NMR of the OMEOx macrocyclic acetals

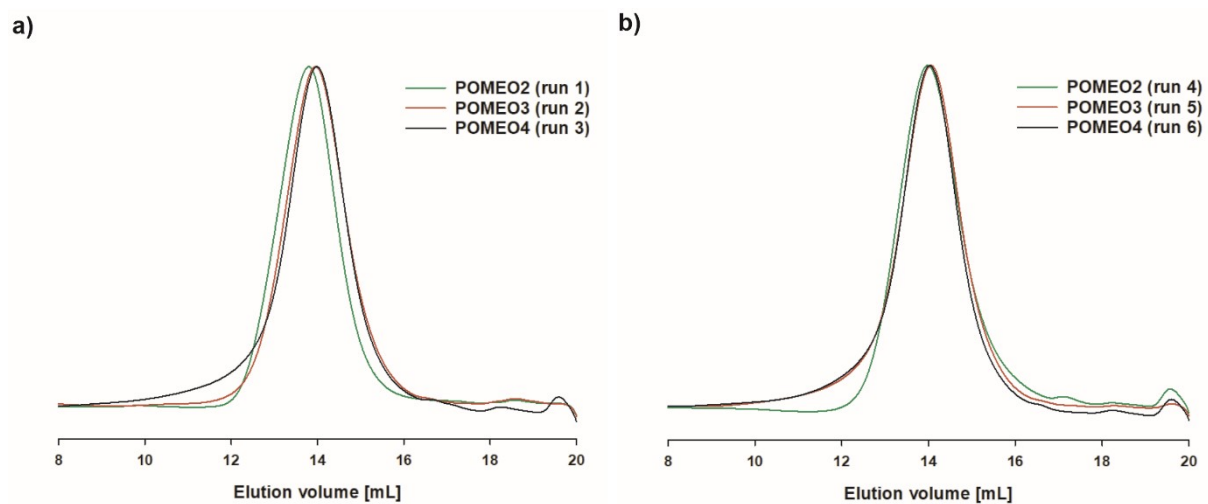

**Figure S2.** Size Exclusion Chromatography (SEC) curves of purified homopolymers prepared a) with triethyloxonium tetrafluoroborate (runs 1,2 and 3), and b) with triethyloxonium hexafluoroantimonate (run 4, 5, and 6)
